# Supplementary material for: Sputnik Light and Sputnik V Vaccination Is Effective at Protecting Medical Personnel from COVID-19 during the Period of Delta Variant Dominance
Source: MDPI journal article supplement (doi:10.3390/vaccines10111804), 2022-10-26
Supplement: s1 [file s1]

## Supplementary

# Sputnik Light and Sputnik V vaccination is effective in protecting medical personnel from COVID-19 during the period of Delta variant dominance

Gennady T. Sukhikh<sup>1</sup>, Tatiana V. Priputnevich<sup>1</sup>, Darya A. Ogarkova<sup>2</sup>, Andrei A. Pochtovyi<sup>2,3</sup>, Daria D. Kustova<sup>2</sup>, Vladimir I. Zlobin<sup>2</sup>, Denis Y. Logunov<sup>2</sup>, Vladimir A. Gushchin<sup>2,3,\*</sup> and Alexander L. Gintsburg<sup>2,4</sup>

**Table S1.** Cases distribution of the medical center's employers, depending on the vaccination status during the entire period (11/26/2020 – 02/08/2022).

| Vaccination status  | Cases | Non-cases | VE, % (95% CI)           |                          |
|---------------------|-------|-----------|--------------------------|--------------------------|
|                     |       |           | (1-RR)                   | (1-HR)                   |
| Unvaccinated        | 199   | 0         |                          |                          |
| One dose            | 22    | 115       | 83.9%<br>(76.5% – 89.0%) | 87.2%<br>(80.1% - 91.8%) |
| Two doses           | 263   | 648       | 71.1%<br>(68.0% - 73.9%) | 89.2%<br>(86.9% - 91.0%) |
| Three or four doses | 1     | 39        | 97.5%<br>(82.7% - 99.6%) | 96.5%<br>(75.0% - 99.5%) |
| At least one dose   | 286   | 802       | 73.7%<br>(70.9% – 76.2%) | 89.1% (86.9% – 91.0%)    |

**Table S2.** Age depending on case severity and vaccination status (M±SD (95% CI))

| Severity  | Unvaccinated<br>(n=512)                       | Vaccinated<br>(n=285)                        | p (Student's T-test) |
|-----------|-----------------------------------------------|----------------------------------------------|----------------------|
| Mild      | 344 (99.4%)<br>43.37±12.17<br>(42.08 – 44.66) | 221 (100%)<br>41.32±12.49<br>(39.66 – 42.97) | 0.053                |
| Moderate  | 151 (100%)<br>44.87±11.70<br>(42.99 – 46.75)  | 59 (100%)<br>44.81±13.81<br>(41.22 – 48.41)  | 0.977                |
| Severe    | 17 (100%)<br>49.47±14.41<br>(42.07 – 56.88)   | 5 (100%)<br>48.20±6.14<br>(40.58 – 55.82)    | 0.852                |
| p (ANOVA) | 0.076                                         | 0.098                                        |                      |
